# Supplementary figures and images for: Novel Aspects on The Interaction Between Grapevine and Plasmopara viticola: Dual-RNA-Seq Analysis Highlights Gene Expression Dynamics in The Pathogen and The Plant During The Battle For Infection
Source: MDPI journal article supplement (doi:10.3390/genes11030261), 2020-02-28

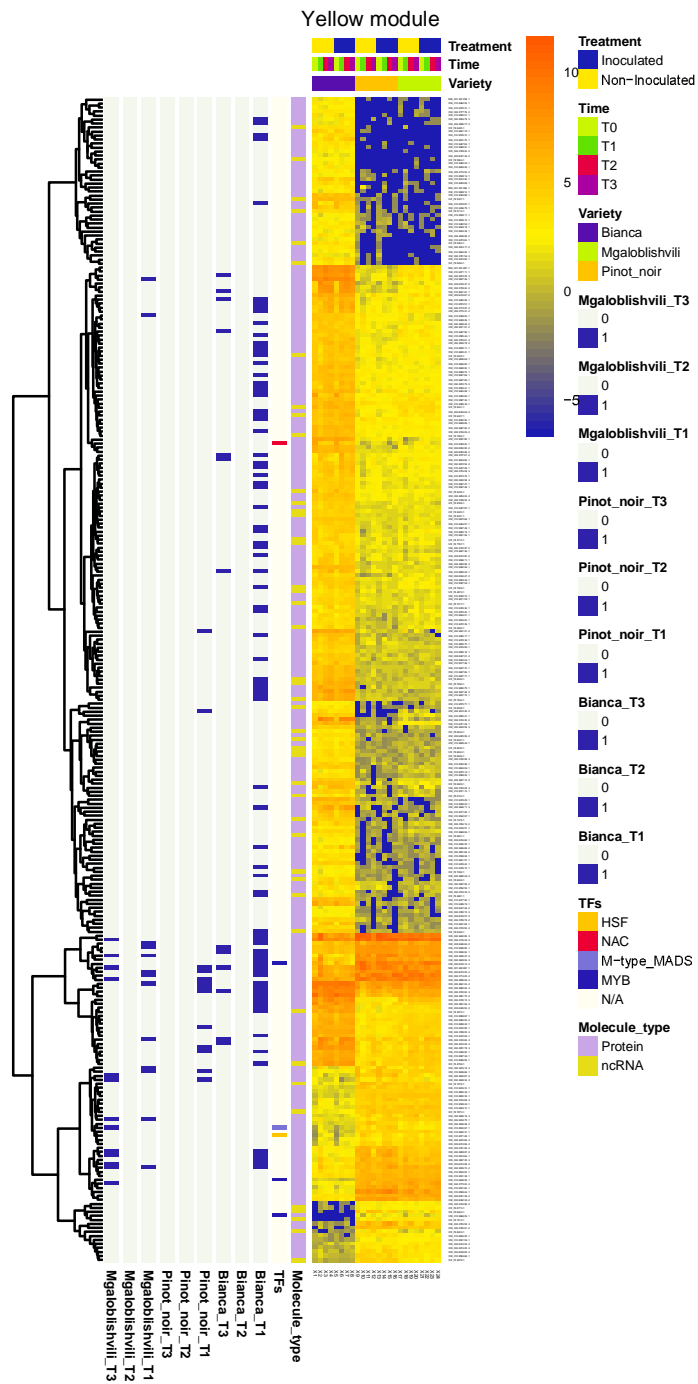

Supplement: s1 [file s1]

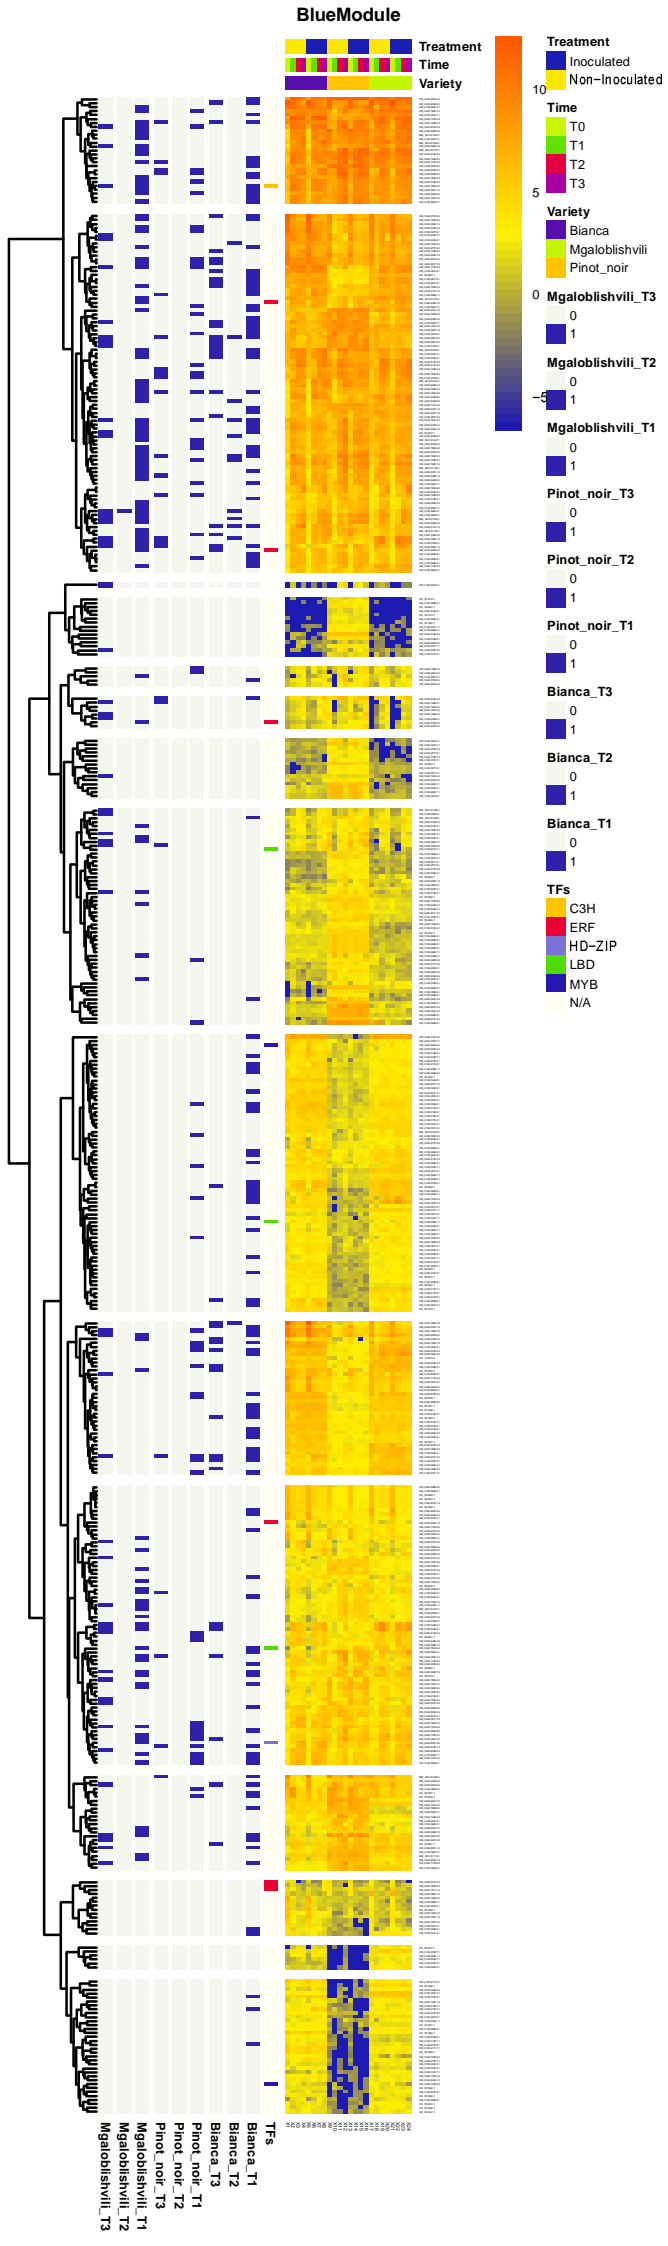

Supplement: s1 [file s1]
